# Supplementary material
Source: publisher site journal article supplement (https://www.spandidos-publications.com/8239/downloadSupplementary)
Supplement: Supplementary file 1 [file downloadSupplementary]

**Table SI.** Sequence of the primers used for reverse transcription-quantitative PCR-based mRNA expression analyses.

| <b>Gene</b>     | <b>Forward Primer</b>   | <b>Reverse Primer</b>   |
|-----------------|-------------------------|-------------------------|
| <i>ATP7A</i>    | AGGCAGAAGTAAGGTATAATCC  | CTCACAACAAGTTCCAAAAC    |
| <i>ATP7B</i>    | AAAGAGCAAAACCTCAGAAG    | CCCTGATGATTAAATTGTCCTC  |
| <i>BAX</i>      | TTTGCTTCAGGGTTTCATC     | CTCAGCTTCTTGGTGGAC      |
| <i>BBC3</i>     | CTCATCATGGGACTCCTG      | GCTACATGGTGCAGAGAA      |
| <i>BCL2</i>     | CGACTCCTGATTCAATGG      | TCTACTTCTCTGTGATGT      |
| <i>BCRP</i>     | AAAGCCACAGAGATCATAGAG   | GATCTTCTTCTTCTTCTCACC   |
| <i>BRCA1</i>    | AAGACTTCTACAGAGTGAA     | CAGTTCCAAGGTTAGAGA      |
| <i>BRCA2</i>    | AACAACAATTACGAACCAA     | AACATTCCTTCCTAAGTCTA    |
| <i>CCNB1</i>    | CCTTCGGAGAGCATCTAA      | CATAGTTAGTTCATCAGGTATT  |
| <i>CDKN1A</i>   | TACATCTTCTGCCTTAGT      | TCTTAGGAACCTCTCATT      |
| <i>CDKN2A</i>   | AGGTCCCTCAGACATCC       | AATGAAAACACTACGAAAGCGG  |
| <i>CTR1</i>     | TGATGCCTATGACCTTCTAC    | GAATGCTGACTTGTGACTTAC   |
| <i>CTR2</i>     | CTGTACTGTATGAAGGCATC    | AAAGTGACACAAATACCACC    |
| <i>CXCL8</i>    | GCGCCAACACAGAAATTATTGTA | TGAATTCTCAGCCCTTCAAAAAC |
| <i>FAS-L</i>    | CAATCTTACCAGTGCTGAT     | AATCCCAAAGTGCTTCTC      |
| <i>FAS-R</i>    | TTATCTGATGTTGACTTGAGTAA | GGCTTCATTGACACCATT      |
| <i>GADD45A</i>  | ATCCACATTCATCTCAAT      | GTA ACTACAAAGGTATTTCA   |
| <i>GAPDH</i>    | CATGAGAAGTATGACAACAG    | ATGAGTCCTTCCACGATA      |
| <i>GPX1</i>     | GCCAAGAACGAAGAGATT      | TCGAAGAGCATGAAGTTG      |
| <i>GSTM1</i>    | ACTATCCTTCGTGAACATC     | AGACACAACCACTAACAG      |
| <i>HMOX1</i>    | CAACAAAGTGCAAGATTC      | AGAAAGCTGAGTGTAAGG      |
| <i>MATE1</i>    | GAGACATCATTAACTGGTGG    | CAACCTTCTGATTTCCACTC    |
| <i>MDR1</i>     | AGTCGGAGTATCTTCTTC      | TTGAATAGCGAAACATTGA     |
| <i>MRP1</i>     | AGCAGAAAAATGTGTTAGGG    | TACCCACTGGTAATACTTGG    |
| <i>OCT2</i>     | GAAGCCGAAAATATGCAAAG    | TGCAGGGATTCTACTTTTG     |
| <i>PCNA</i>     | TTACCATAGAGATGAATGAACCA | AGTGTACCGTTGAAGAG       |
| <i>PGC1a</i>    | CACCCCATCATCACTGGAGG    | CAATGGCCCACGGTCTTCTA    |
| <i>PPARGC1A</i> | GCGAAGAGTATTTGTCAACA    | TTGGTTTGGCTTGTAAGTG     |
| <i>RALBP1</i>   | AAAAGACAGGAGTGTGAAAC    | G TTCAGTCAGGATCTCATTC   |
| <i>RAD51</i>    | AATTAGTTCCAATGGGTTT     | TGAAGTAGTTTGTCAAGC      |
| <i>SOD1</i>     | TCTGTTTCAATGACCTGTATT   | GCCTCATAATAAGTGCCATA    |
| <i>TOP2A</i>    | ACGGTGTTGGATATTCTAAG    | AAGCGAGCCTGATTATTC      |
| <i>TOP2B</i>    | ATAACATTCCAACCAGAT      | GGCAATTTCTTTCCATTA      |
| <i>TOPBP1</i>   | GCTCCAACGAGTTCAGAA      | CCTTTATCTTCAATGCCTCTTC  |
| <i>β-ACTIN</i>  | TGGCATCCACGAAACTACC     | GTGTTGGCGTACAGGTCTT     |

**Table SII.** Summary of cross-sensitivity of A2780 and A2780ADR cells to selected anticancer drugs and modifiers of the DNA repair and DDR.

| Inhibitor               | Experiments (n)* | Treatment period | Cell line | IC <sub>50</sub> (μM) | Resistance of A2780ADR | Inhibitor               | Experiments (n)* | Treatment period | Cell line | IC <sub>50</sub> (μM) | Resistance of A2780ADR |
|-------------------------|------------------|------------------|-----------|-----------------------|------------------------|-------------------------|------------------|------------------|-----------|-----------------------|------------------------|
| Doxorubicin             | 7                | 24 h             | A2780     | > 1                   | 0                      | Doxorubicin             | 7                | 72 h             | A2780     | ~ 0.04                | ++++                   |
|                         |                  | 24 h             | A2780ADR  | > 1                   |                        |                         |                  | 72 h             | A2780ADR  | ~ 0.40                |                        |
| Etoposide               | 3                | 24 h             | A2780     | >10                   | 0                      | Etoposide               | 3                | 72 h             | A2780     | ~ 0.14                | +++                    |
|                         |                  | 24 h             | A2780ADR  | >10                   |                        |                         |                  | 72 h             | A2780ADR  | ~ 0.92                |                        |
| Cisplatin               | 3                | 24 h             | A2780     | ~ 11.5                | ++                     | Cisplatin               | 3                | 72 h             | A2780     | ~ 0.4                 | ++                     |
|                         |                  | 24 h             | A2780ADR  | ~ 31.5                |                        |                         |                  | 72 h             | A2780ADR  | ~ 1.5                 |                        |
| Dexrazoxane             | 3                | 24 h             | A2780     | >50                   | 0                      | Dexrazoxane             | 3                | 72 h             | A2780     | 5.3                   | 0                      |
|                         |                  | 24 h             | A2780ADR  | >50                   |                        |                         |                  | 72 h             | A2780ADR  | 5.2                   |                        |
| Olaparib                | 3                | 24 h             | A2780     | >100                  | 0                      | Olaparib                | 3                | 72 h             | A2780     | ~ 1.9                 | ++++                   |
|                         |                  | 24 h             | A2780ADR  | >100                  |                        |                         |                  | 72h              | A2780ADR  | ~ 29.0                |                        |
| Niraparib               | 3                | 24 h             | A2780     | >50                   | 0                      | Niraparib               | 3                | 72 h             | A2780     | ~ 1.2                 | +++                    |
|                         |                  | 24 h             | A2780ADR  | >50                   |                        |                         |                  | 72 h             | A2780ADR  | ~ 6.8                 |                        |
| Prexasertib (AZD77662)  | 1                | 24 h             | A2780     | ~ 0.6                 | +                      | Prexasertib (AZD77662)  | 1                | 72 h             | A2780     | ~ 0.06                | ++                     |
|                         |                  | 24 h             | A2780ADR  | ~ 1.2                 |                        |                         |                  | 72 h             | A2780ADR  | ~ 0.26                |                        |
| Rabuseritib (LY2603618) | 1                | 24 h             | A2780     | >2.5                  | 0                      | Rabuseritib (LY2603618) | 1                | 72 h             | A2780     | ~ 1.1                 | +                      |
|                         |                  | 24 h             | A2780ADR  | >2.5                  |                        |                         |                  | 72 h             | A2780ADR  | ~ 2.5                 |                        |
| EHT1864                 | 5                | 24 h             | A2780     | >30                   | 0                      | EHT1864                 | 5                | 72h              | A2780     | ~ 4.8                 | 0                      |
|                         |                  | 24 h             | A2780ADR  | ~26.8                 |                        |                         |                  | 72h              | A2780ADR  | ~ 7.0                 |                        |
| Ehop16                  | 1                | 24 h             | A2780     | ~ 8.7                 | 0                      | Ehop16                  | 1                | 72 h             | A2780     | ~ 4.9                 | 0                      |
|                         |                  | 24 h             | A2780ADR  | ~ 6.5                 |                        |                         |                  | 72 h             | A2780ADR  | ~ 5.4                 |                        |

|              |   |      |          |      |   |  |              |   |      |          |        |    |
|--------------|---|------|----------|------|---|--|--------------|---|------|----------|--------|----|
| Entinostat   | 2 | 24 h | A2780    | >10  | 0 |  | Entinostat   | 2 | 72 h | A2780    | ~ 0.5  | ++ |
|              |   | 24 h | A2780ADR | >10  |   |  |              |   | 72 h | A2780ADR | ~ 1.4  |    |
| Ricolinostat | 1 | 24 h | A2780    | >10  | 0 |  | Ricolinostat | 1 | 72 h | A2780    | ~ 4.8  | 0  |
|              |   | 24 h | A2780ADR | >10  |   |  |              |   | 72 h | A2780ADR | ~ 6.7  |    |
| Verapamil    | 2 | 24 h | A2780    | >100 | 0 |  | Verapamil    | 2 | 72 h | A2780    | ~ 66.7 | 0  |
|              |   | 24 h | A2780ADR | >100 |   |  |              |   | 72 h | A2780ADR | ~ 76.3 |    |

\*Number of independent experiments (each performed in biological quadruplicates). 0, considered as not resistant as compared to parental A2780 (difference  $IC_{50} < 1.5$ ); +, weak drug resistance as compared to parental A2780 (difference  $IC_{50} \geq 1.5 < 2.5$ ); ++, intermediate drug resistance as compared with parental A2780 (difference  $IC_{50} \geq 2.5 < 5.0$ ); +++, strong drug resistance as compared to parental A2780 (difference  $IC_{50} \geq 5.0 < 10.0$ ); +++++, very strong resistance as compared to parental A2780 (difference  $IC_{50} \geq 10.0$ ).
